# Supplementary material for: Mycobacterium Time-Series Genome Analysis Identifies AAC2′ as a Potential Drug Target with Naloxone Showing Potential Bait Drug Synergism
Source: MDPI journal article supplement (doi:10.3390/molecules27196150), 2022-09-20
Supplement: s1 [file s1]

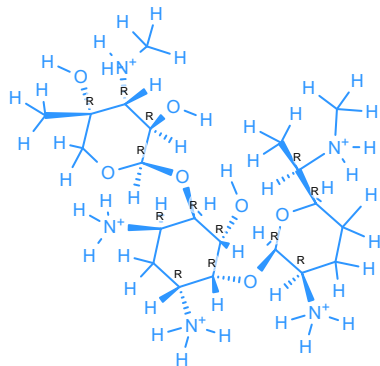

Source File gentamicin.sdf  
docking score -6.036

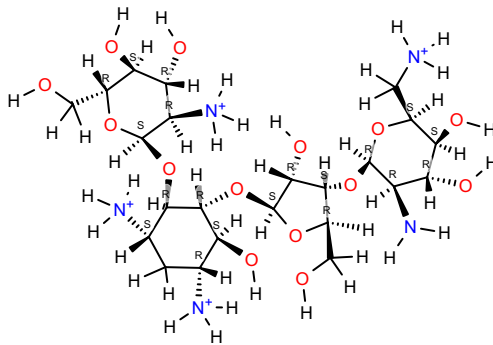

Source File Paromomycin.sdf  
docking score -5.977

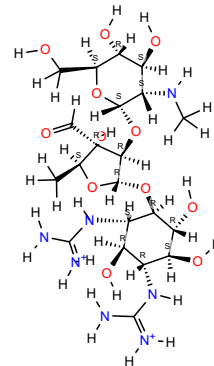

Source File streptomycin.sdf  
docking score -5.907

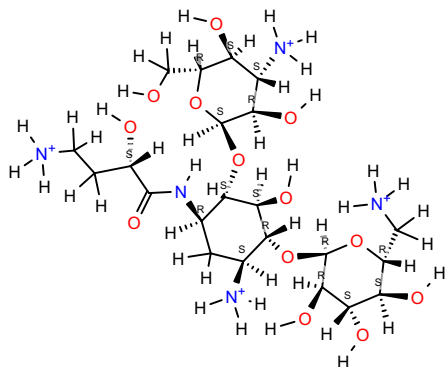

Source File amikacin.sdf  
docking score -5.844

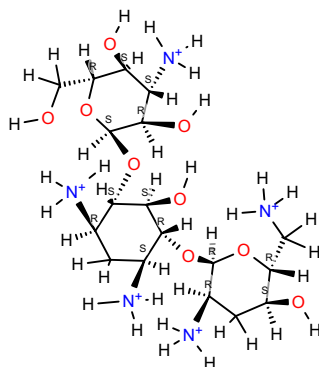

Source File tobramycin.sdf  
docking score -5.733

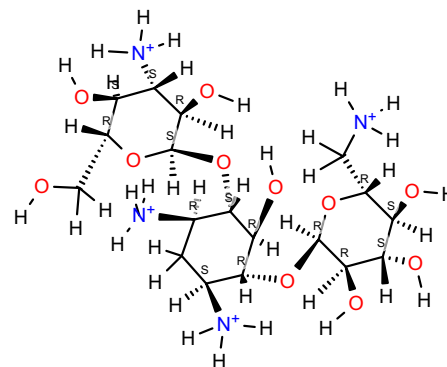

Source File kanamycin.sdf  
docking score -5.65

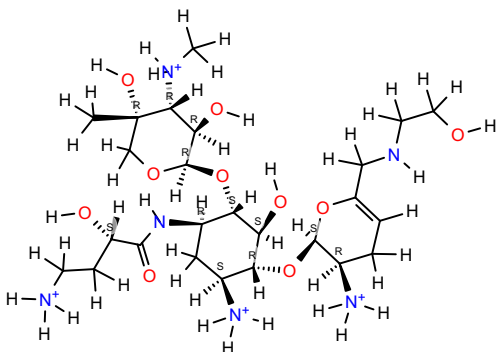

Source File plazomicin.sdf  
docking score -5.328

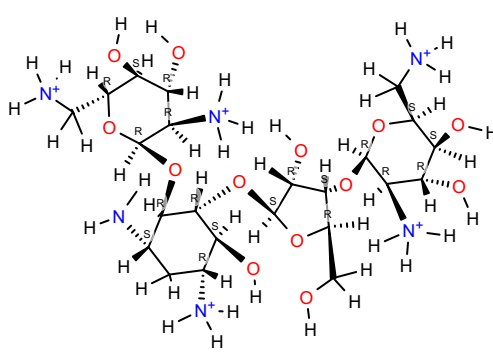

Source File neomycin.sdf  
docking score -5.235

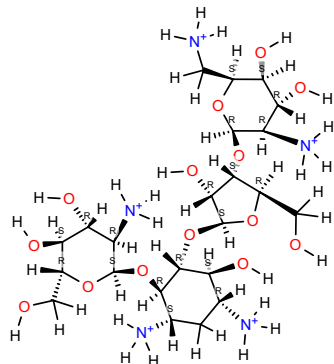

|               |                  |
|---------------|------------------|
| zinc_id       | ZINC000060183170 |
| docking score | -10.201          |

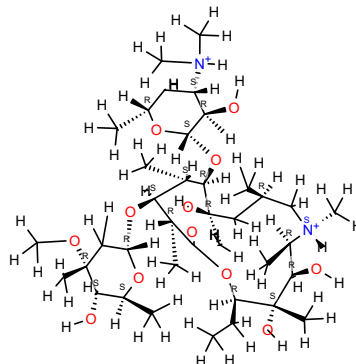

|               |                  |
|---------------|------------------|
| zinc_id       | ZINC000085537026 |
| docking score | -6.677           |

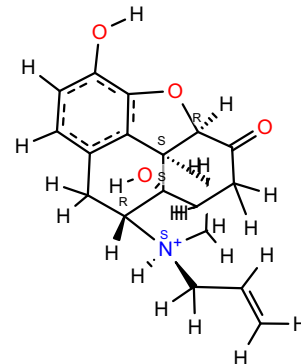

|               |                  |
|---------------|------------------|
| zinc_id       | ZINC000000389747 |
| docking score | -6.317           |

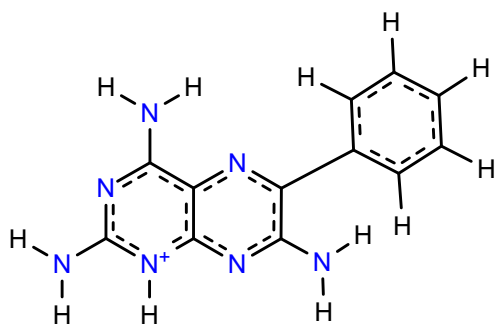

|               |                  |
|---------------|------------------|
| zinc_id       | ZINC000000120286 |
| docking score | -3.521           |
